# Supplementary material
Source: PubMed Central journal article supplement (PMC3232366)
Supplement: supp_btr565_tbl_S3.pdf [file supp_btr565_tbl_S3.pdf]

**Table S3.** Notation for the substitution scores considered.

| Our notation                                                                                                                                          | Petrokovski, 1996 | Panchenko, 2003  | Mittelman <i>et al.</i> , 2003                            | Marti-Renom <i>et al.</i> , 2004 | Edgar & Sjölander, 2004              | Wang & Dunbrack, 2004              | Edgar, 2004b        | Ohlson <i>et al.</i> , 2004 | First proposed                                                                                             |
|-------------------------------------------------------------------------------------------------------------------------------------------------------|-------------------|------------------|-----------------------------------------------------------|----------------------------------|--------------------------------------|------------------------------------|---------------------|-----------------------------|------------------------------------------------------------------------------------------------------------|
| <i>Euclid-f</i><br><i>Euclid-g</i><br><i>Euclid-q</i><br><i>Euclid-r</i><br><i>Euclid-s</i>                                                           | d                 |                  |                                                           | S <sup>(3)</sup>                 | euclidf<br>euclidp                   |                                    |                     |                             |                                                                                                            |
| <i>dot-f</i><br><i>dot-g</i><br><i>dot-q</i><br><i>dot-r</i><br><i>dot-s</i><br><i>ldot-g</i><br><i>ldot-r</i><br><i>ldot-gr</i>                      | p                 |                  | Dot Product2<br>Dot Product                               | S <sup>(1)</sup>                 | fdotf<br>pdotp<br>mdotm<br>prc       | DotPFreq<br>DotPOdds               |                     | DP                          | Rychlewski <i>et al.</i> , 2000<br><br>Madera <i>et al.</i> , 2004<br>Söding, 2005                         |
| <i>corr-f</i><br><i>corr-g</i><br><i>corr-q</i><br><i>corr-r</i><br><i>corr-s</i><br><i>rank-f</i><br><i>rank-g</i><br><i>rank-q</i><br><i>rank-r</i> | r<br><br>rho      | Score function 3 | Corr Coef1F<br>Corr Coef1<br>Corr Coef2                   | S <sup>(2)</sup>                 | correlf<br>correlp<br>rankf<br>rankp |                                    | LAMA<br><br>CORREL  |                             |                                                                                                            |
| <i>aS-f</i><br><i>aS-q</i><br><i>laQ-f</i><br><i>laQ-q</i><br><i>laR-f</i><br><i>laR-q</i>                                                            |                   |                  | Sum of Pairs2<br>Sum of Pairs                             |                                  | al<br><br>la                         | CrossProduct<br>LogAverage         | PSF<br><br>LE<br>LA |                             | Bacon & Anderson, 1986<br><br>von Ohsen & Zimmer, 2001                                                     |
| <i>sre-q</i><br><i>JS-f</i><br><i>JS-q</i><br><i>YL-f</i><br><i>YL-q</i>                                                                              |                   |                  |                                                           | S <sup>(4)</sup>                 | re<br>yldf<br>yld<br>ylf<br>yl       |                                    |                     |                             | Sjölander, 1998                                                                                            |
| <i>sdot-fs</i><br><i>comp-fs</i><br><i>sdot-cs</i><br><i>comp-cs</i><br><i>sdot-qs</i><br><i>BILD</i>                                                 |                   | Score function 2 | Prof_Sim<br>Picasso3<br>Compass2<br>Compass1<br>Picasso3Q |                                  |                                      | JensenShannon<br><br>LogOddsMultin | YL                  | prof_sim<br><br>prob_score  | Yona & Levitt, 2002<br><br>Sadreyev & Grishin, 2003<br>Heger & Holm, 2003<br>Altschul <i>et al.</i> , 2010 |
